# Supplementary material for: Effects of COVID-19 Pandemic on Progress Test Performance in German-Speaking Countries
Source: Hindawi journal article supplement (doi:10.1155/2022/3023026), 2022-08-30
Supplement: f1 [file 3023026.f1.pdf]

## Supplementary Materials

### “Effects of COVID-19 Pandemic on Progress Test performance in German Speaking Countries.”

Sehy, Roselló Atanet, Sieg, Struzena, März

#### 1. Supplementary Tables

##### Supplementary Table 1

Mixed regression model output for pair PT36-PT41<sup>a</sup>

| Predictors                                              | Estimates   | CI            | p-value | R <sup>2</sup> <sup>b</sup> |
|---------------------------------------------------------|-------------|---------------|---------|-----------------------------|
| (Intercept)                                             | 0.59        | -3.66 – 4.84  |         |                             |
| Test no. [41]                                           | 2.53        | 1.31 – 3.75   | <0.01   | 0.00                        |
| Semester                                                | 5.7         | 5.00 – 6.40   | <0.01   | 0.30                        |
| Test modality [ePT]                                     | 5.04        | 3.06 – 7.01   | <0.01   | 0.01                        |
| Test modality [Paper-Pencil]                            | 3.67        | 1.70 – 5.63   | <0.01   | 0.01                        |
| Test no. [41] * semester                                | -0.32       | -0.50 – -0.13 | 0.01    | 0.00                        |
| <b>Random Effects</b>                                   |             |               |         |                             |
| $\sigma^2$                                              | 224.11      |               |         |                             |
| $\tau_{00}$ uni                                         | 35.17       |               |         |                             |
| $\tau_{11}$ uni.semester                                | 1.08        |               |         |                             |
| ICC                                                     | 0.14        |               |         |                             |
| $N_{uni}$                                               | 9           |               |         |                             |
| Observations                                            | 13,372      |               |         |                             |
| Marginal R <sup>2</sup> /<br>Conditional R <sup>2</sup> | 0.49 / 0.56 |               |         |                             |

*Abbreviations:* CI = confidence interval; Test no. = (Progress) Test number; ePT = electronic Progress Test; uni = University

<sup>a</sup> PT pair (every PT shares a considerable number of questions with the PT that took place five semesters before, i.e., No 36 & 41; PT 36 = summer semester 2017, PT 41 = winter semester 2019/20, N = 13372).

<sup>b</sup> semi partial  $r^2$  for fixed effects

## Supplementary Table 2

### Mixed regression model output for pair PT37-PT42<sup>a</sup>

| Predictors                                              | Estimates   | CI           | p-value | R <sup>2</sup> <sup>b</sup> |
|---------------------------------------------------------|-------------|--------------|---------|-----------------------------|
| (Intercept)                                             | 3.57        | 1.05 – 6.08  |         |                             |
| Test no. [42]                                           | 3.72        | 2.57 – 4.88  | <0.01   | 0.00                        |
| Semester                                                | 4.37        | 3.72 – 5.02  | <0.01   | 0.27                        |
| Test modality [ePT]                                     | 5           | 3.91 – 6.08  | <0.01   | 0.14                        |
| Test modality [Paper-Pencil]                            | 1.79        | 0.62 – 2.96  | <0.01   | 0.00                        |
| Test no. [42] * semester                                | 0.04        | -0.11 – 0.20 | 0.59    | 0                           |
| <b>Random Effects</b>                                   |             |              |         |                             |
| $\sigma^2$                                              | 163.31      |              |         |                             |
| $\tau_{00 \text{ uni}}$                                 | 10.9        |              |         |                             |
| $\tau_{11 \text{ uni.semester}}$                        | 0.92        |              |         |                             |
| ICC                                                     | 0.06        |              |         |                             |
| $N_{\text{uni}}$                                        | 9           |              |         |                             |
| Observations                                            | 13,121      |              |         |                             |
| Marginal R <sup>2</sup> /<br>Conditional R <sup>2</sup> | 0.49 / 0.52 |              |         |                             |

*Abbreviations:* CI = confidence interval; Test no. = (Progress) Test number; ePT = electronic Progress Test; uni = University

<sup>a</sup> PT pair (every PT shares a considerable number of questions with the PT that took place five semesters before, i.e., No 37 & 42; PT 37= winter semester 2017/18, PT 42 = summer semester 2020, N = 13,121).

<sup>b</sup> semi partial  $r^2$  for fixed effects

### Supplementary Table 3

#### Mixed regression model output for pair PT38-PT43<sup>a</sup>

| Predictors                                              | Estimates   | CI            | p-value | R <sup>2</sup> <sup>b</sup> |
|---------------------------------------------------------|-------------|---------------|---------|-----------------------------|
| (Intercept)                                             | 3.93        | 1.75 – 6.12   |         |                             |
| Test no. [43]                                           | 5.66        | 4.63 – 6.69   | <0.01   | 0.01                        |
| Semester                                                | 4.71        | 4.09 – 5.34   | <0.01   | 0.28                        |
| Test modality [ePT]                                     | 4.83        | 3.55 – 6.11   | <0.01   | 0.02                        |
| Test modality [Paper-Pencil]                            | -0.84       | -1.93 – 0.25  | 0.13    | 0                           |
| Test no. [43] * semester                                | -0.3        | -0.46 – -0.14 | <0.01   | 0.00                        |
| <b>Random Effects</b>                                   |             |               |         |                             |
| $\sigma^2$                                              | 187.51      |               |         |                             |
| $\tau_{00 \text{ uni}}$                                 | 8.27        |               |         |                             |
| $\tau_{11 \text{ uni.semester\_unfac}}$                 | 0.88        |               |         |                             |
| ICC                                                     | 0.04        |               |         |                             |
| $N_{\text{uni}}$                                        | 9           |               |         |                             |
| Observations                                            | 13,822      |               |         |                             |
| Marginal R <sup>2</sup> /<br>Conditional R <sup>2</sup> | 0.48 / 0.51 |               |         |                             |

*Abbreviations:* CI = confidence interval; Test no. = (Progress) Test number; ePT = electronic Progress Test; uni = University

<sup>a</sup> PT pair (every PT shares a considerable number of questions with the PT that took place five semesters before, i.e., No 38 & 43; PT 38 = summer semester 2018, PT 43 = winter semester 2020/21 N = 13,822).

<sup>b</sup> semi partial r<sup>2</sup> for fixed effects

## Supplementary Table 4

Net changes per subject, defined as the differences in the percentage share of correct answers between the two tests of each PT pair<sup>a</sup>, restricted to the subset of questions related to each subject; data were collected from PT tests administered by nine medical schools in Germany and Austria and analyzed in January 2021.

| Subject                                                      | PT41-PT36 <sup>b</sup> | PT42-PT37 <sup>c</sup> | PT43-PT38 <sup>d</sup> |
|--------------------------------------------------------------|------------------------|------------------------|------------------------|
| General Practice                                             |                        | 0.97                   | 1.36                   |
| <b>Anesthesiology, Emergency Medicine and Intensive Care</b> | <b>3.48</b>            | <b>5.41</b>            | <b>10.05</b>           |
| Anatomy, Biology                                             | 7.15                   | 0.11                   | 3.18                   |
| Occupational and Social Medicine, Healthcare                 |                        | 2.43                   | 0.72                   |
| Ophthalmology                                                | 3.02                   |                        | 0.40                   |
| Biochemistry, Chemistry, Molecular Biology                   |                        | -2.50                  | 4.19                   |
| Surgery                                                      | 1.90                   | 3.96                   | 5.19                   |
| Dermatology                                                  | 0.87                   | 1.34                   | -0.56                  |
| <b>Epidemiology, Medical Biometrics</b>                      | <b>2.92</b>            | <b>14.76</b>           | <b>22.56</b>           |
| Gynecology and Obstetrics                                    | 0.77                   | 6.33                   | 7.17                   |
| Otorhinolaryngology                                          | -0.93                  |                        | -0.86                  |
| Human Genetics                                               | -5.02                  | 0.52                   | 3.43                   |
| Hygiene, Microbiology                                        | 0.04                   | 1.71                   | 1.74                   |
| Internal Medicine                                            | -0.20                  | 2.07                   | 5.67                   |
| Paediatrics                                                  | 2.54                   | 4.24                   | 2.56                   |
| Clinical Chemistry, Clinical Pathology                       | -2.94                  |                        |                        |
| Med. Psychology/Sociology                                    |                        |                        | 5.18                   |
| Naturopathy, Physical Medicine                               |                        |                        |                        |
| Neurology                                                    | 2.80                   | 4.58                   | 4.69                   |
| Orthopedics                                                  | 6.69                   | 2.62                   | 9.65                   |
| Pathology                                                    | -5.31                  | 4.21                   | 1.59                   |
| Pharmacology, Toxicology                                     | -1.09                  | 5.19                   | 0.80                   |
| Physiology, Physics                                          | 5.14                   | 0.05                   | 7.10                   |
| Psychiatry, Psychosomatic Medicine                           | 4.53                   | 9.22                   | 5.75                   |
| Radiology, Nuclear Medicine                                  | -1.05                  | -1.11                  | 0.69                   |
| Legal Medicine                                               | 5.64                   |                        | 2.09                   |
| Urology                                                      | -0.24                  | -2.13                  | 1.00                   |
| <b>Average change</b>                                        | <b>1.40</b>            | <b>3.05</b>            | <b>4.21</b>            |

Abbreviations: PT = Progress Test Medizin

<sup>a</sup> PT pair (every PT shares a considerable number of questions with the PT that took place five semesters before, i.e., No 36 & 41, No 37 & 42, No 38 & 43)

<sup>b</sup> PT 36 = summer semester 2017, PT 41 = winter semester 2019/20, N = 13,372

<sup>c</sup> PT 37 = winter semester 2017/18, PT 42 = summer semester 2020, N = 13,121

<sup>d</sup> PT 38 = summer semester 2018, PT 43 = winter semester 2020/21 N = 13,822
